# Supplementary material
Source: ML conference proceedings conference paper supplement (https://openreview.net/forum?id=Z_3x5eFk1l-)
Supplement: supplementary_material [file attachment]

## SUPPLEMENTARY MATERIAL FOR ADVERSARIAL META-LEARNING

## TREND OF AVERAGE LOSS &amp; TOP-1 ACCURACY FOR 5-WAY 5-SHOT LEARNING ON MINIIAMNET

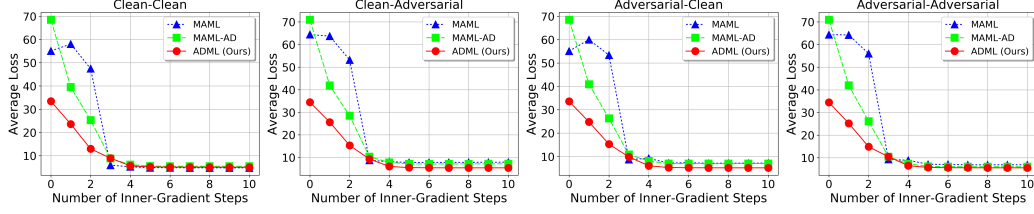

Figure 4: Average loss over the gradient update step for 5-way 5-shot learning on MiniImageNet

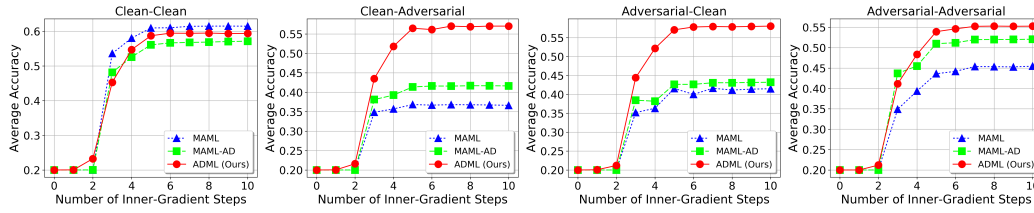

Figure 5: Top-1 accuracy over the gradient update step for 5-way 5-shot learning on MiniImageNet

## MODEL SPECIFICATION

For both datasets (i.e, MiniImageNet and CIFAR100), we followed the architecture used by Finn et al. (2017) for image embedding, which contains four  $3 \times 3$  convolutional blocks with batch normalizations, ReLU activations and  $2 \times 2$  max-poolings. *Note that this model is the threatened by the aforementioned adversarial attacks.*

## CIFAR100 WITH FGSM ATTACK

Note that the maximum perturbations adopted in FGSM Attack are 2 and 0.2.

Table 3: Average classification accuracies on CIFAR100 with FSGM Attack (5-way, 1-shot)

| Method        | Backbone       | Meta-testing | $\epsilon = 2$                    |                                   | $\epsilon = 0.2$                  |                                   |
|---------------|----------------|--------------|-----------------------------------|-----------------------------------|-----------------------------------|-----------------------------------|
|               |                |              | Clean                             | Adversarial                       | Clean                             | Adversarial                       |
| MAML          | 32-32-32-32    | Clean        | 57.67 $\pm$ 1.76%                 | 26.40 $\pm$ 1.55%                 | 57.67 $\pm$ 1.76%                 | 43.30 $\pm$ 1.68%                 |
|               |                | Adversarial  | 28.13 $\pm$ 1.56%                 | 28.23 $\pm$ 1.64%                 | 43.03 $\pm$ 1.76%                 | 39.00 $\pm$ 1.70%                 |
| MAML-AD       | 32-32-32-32    | Clean        | 52.70 $\pm$ 1.89%                 | 36.20 $\pm$ 1.65%                 | 52.70 $\pm$ 1.89%                 | 39.17 $\pm$ 1.82%                 |
|               |                | Adversarial  | 37.27 $\pm$ 1.72%                 | 41.67 $\pm$ 1.86%                 | 37.80 $\pm$ 1.70%                 | 37.60 $\pm$ 1.78%                 |
| Matching Nets | 64-64-64-64    | Clean        | 47.94 $\pm$ 0.56%                 | 25.06 $\pm$ 0.36%                 | 47.68 $\pm$ 0.52%                 | 39.03 $\pm$ 0.51%                 |
|               |                | Adversarial  | 24.82 $\pm$ 0.46%                 | 27.72 $\pm$ 0.43%                 | 40.08 $\pm$ 0.57%                 | 37.79 $\pm$ 0.44%                 |
| Relation Nets | 64-96-128-256  | Clean        | 58.68 $\pm$ 0.92%                 | 31.11 $\pm$ 0.93%                 | 58.72 $\pm$ 0.90%                 | 45.03 $\pm$ 0.76%                 |
|               |                | Adversarial  | 30.85 $\pm$ 0.92%                 | 30.52 $\pm$ 0.59%                 | 45.85 $\pm$ 1.01%                 | 41.40 $\pm$ 0.80%                 |
| R2D2 (64C)    | 64-64-64-64    | Clean        | 59.76 $\pm$ 2.04%                 | 26.07 $\pm$ 1.00%                 | 59.76 $\pm$ 2.04%                 | 35.53 $\pm$ 1.47%                 |
|               |                | Adversarial  | 27.20 $\pm$ 1.52%                 | 31.51 $\pm$ 1.07%                 | 43.63 $\pm$ 2.17%                 | 37.10 $\pm$ 1.43%                 |
| R2D2          | 96-192-384-512 | Clean        | <b>60.52<math>\pm</math>2.01%</b> | 26.56 $\pm$ 0.93%                 | <b>60.52<math>\pm</math>2.01%</b> | 36.71 $\pm$ 1.45%                 |
|               |                | Adversarial  | 27.90 $\pm$ 1.61%                 | 31.94 $\pm$ 1.26%                 | 43.64 $\pm$ 2.21%                 | 37.73 $\pm$ 1.47%                 |
| ADML (Ours)   | 32-32-32-32    | Clean        | 55.70 $\pm$ 2.00%                 | <b>50.90<math>\pm</math>1.84%</b> | 55.70 $\pm$ 2.00%                 | <b>49.30<math>\pm</math>1.76%</b> |
|               |                | Adversarial  | <b>54.50<math>\pm</math>1.69%</b> | <b>50.60<math>\pm</math>1.83%</b> | <b>52.90<math>\pm</math>1.92%</b> | <b>45.00<math>\pm</math>1.79%</b> |

Table 4: Average classification accuracies on CIFAR100 with FSGM Attack (5-way, 5-shot)

| Method        | Backbone       | Meta-testing | $\epsilon = 2$                    |                                   | $\epsilon = 0.2$                  |                                   |
|---------------|----------------|--------------|-----------------------------------|-----------------------------------|-----------------------------------|-----------------------------------|
|               |                |              | Clean                             | Adversarial                       | Clean                             | Adversarial                       |
| MAML          | 32-32-32-32    | Clean        | 74.03 $\pm$ 0.89%                 | 31.29 $\pm$ 0.78%                 | 74.03 $\pm$ 0.89%                 | 54.15 $\pm$ 1.00%                 |
|               |                | 40%          | 65.69 $\pm$ 0.92%                 | 36.14 $\pm$ 0.84%                 | 68.99 $\pm$ 0.94%                 | 55.79 $\pm$ 0.98%                 |
|               |                | Adversarial  | 33.34 $\pm$ 0.90%                 | 43.66 $\pm$ 0.86%                 | 59.08 $\pm$ 1.00%                 | 53.93 $\pm$ 0.96%                 |
| MAML-AD       | 32-32-32-32    | Clean        | 67.71 $\pm$ 0.96%                 | 44.61 $\pm$ 0.90%                 | 67.73 $\pm$ 0.96%                 | 56.07 $\pm$ 0.95%                 |
|               |                | 40%          | 64.85 $\pm$ 0.90%                 | 53.59 $\pm$ 0.88%                 | 65.93 $\pm$ 0.93%                 | 57.96 $\pm$ 0.93%                 |
|               |                | Adversarial  | 48.37 $\pm$ 0.99%                 | 58.92 $\pm$ 0.97%                 | 59.45 $\pm$ 1.00%                 | 56.33 $\pm$ 0.98%                 |
| Matching Nets | 64-64-64-64    | Clean        | 62.95 $\pm$ 0.46%                 | 28.14 $\pm$ 0.37%                 | 62.58 $\pm$ 0.49%                 | 47.14 $\pm$ 0.45%                 |
|               |                | 40%          | 54.39 $\pm$ 0.48%                 | 28.64 $\pm$ 0.36%                 | 57.86 $\pm$ 0.48%                 | 47.01 $\pm$ 0.48%                 |
|               |                | Adversarial  | 29.40 $\pm$ 0.44%                 | 32.77 $\pm$ 0.42%                 | 53.34 $\pm$ 0.52%                 | 46.50 $\pm$ 0.46%                 |
| Relation Nets | 64-96-128-256  | Clean        | 75.52 $\pm$ 0.66%                 | 35.37 $\pm$ 0.55%                 | 75.22 $\pm$ 0.70%                 | 55.75 $\pm$ 0.68%                 |
|               |                | 40%          | 66.85 $\pm$ 0.79%                 | 36.70 $\pm$ 0.54%                 | 68.67 $\pm$ 0.80%                 | 55.33 $\pm$ 0.69%                 |
|               |                | Adversarial  | 40.46 $\pm$ 0.88%                 | 39.82 $\pm$ 0.57%                 | 60.52 $\pm$ 0.82%                 | 55.50 $\pm$ 0.69%                 |
| R2D2 (64C)    | 64-64-64-64    | Clean        | 76.09 $\pm$ 1.54%                 | 27.83 $\pm$ 1.10%                 | 76.09 $\pm$ 1.54%                 | 38.77 $\pm$ 1.74%                 |
|               |                | 40%          | 69.19 $\pm$ 1.53%                 | 38.00 $\pm$ 1.21%                 | 71.39 $\pm$ 1.54%                 | 50.96 $\pm$ 1.55%                 |
|               |                | Adversarial  | 35.14 $\pm$ 1.75%                 | 43.21 $\pm$ 1.19%                 | 58.99 $\pm$ 1.75%                 | 52.20 $\pm$ 1.62%                 |
| R2D2          | 96-192-384-512 | Clean        | <b>76.29<math>\pm</math>1.44%</b> | 29.53 $\pm$ 1.10%                 | <b>76.29<math>\pm</math>1.44%</b> | 40.28 $\pm$ 1.66%                 |
|               |                | 40%          | <b>69.53<math>\pm</math>1.47%</b> | 39.32 $\pm$ 1.11%                 | <b>71.68<math>\pm</math>1.49%</b> | 52.04 $\pm$ 1.56%                 |
|               |                | Adversarial  | 35.79 $\pm$ 1.60%                 | 43.28 $\pm$ 1.24%                 | 58.85 $\pm$ 1.89%                 | 52.87 $\pm$ 1.48%                 |
| ADML (Ours)   | 32-32-32-32    | Clean        | 69.90 $\pm$ 0.88%                 | <b>65.68<math>\pm</math>0.87%</b> | 69.90 $\pm$ 0.88%                 | <b>66.72<math>\pm</math>0.90%</b> |
|               |                | 40%          | 67.61 $\pm$ 0.93%                 | <b>62.83<math>\pm</math>0.88%</b> | 69.52 $\pm$ 0.88%                 | <b>63.53<math>\pm</math>0.93%</b> |
|               |                | Adversarial  | <b>65.26<math>\pm</math>0.98%</b> | <b>64.18<math>\pm</math>0.86%</b> | <b>66.81<math>\pm</math>0.95%</b> | <b>66.33<math>\pm</math>0.84%</b> |

## MINIIMAGENET WITH FFGSM ATTACK

Note that the maximum perturbations adopted in FFGSM Attack are 2, 1 and 0.5, and the step size is set to 10/255.

Table 5: Average classification accuracies on MiniImageNet with FFGSM Attack (5-way, 1-shot)

| Method        | Backbone       | Meta-testing | $\epsilon = 2$                    |                                   | $\epsilon = 1$                    |                                   | $\epsilon = 0.5$                  |                                   |
|---------------|----------------|--------------|-----------------------------------|-----------------------------------|-----------------------------------|-----------------------------------|-----------------------------------|-----------------------------------|
|               |                |              | Clean                             | Adversarial                       | Clean                             | Adversarial                       | Clean                             | Adversarial                       |
| MAML          | 32-32-32-32    | Clean        | 48.47 $\pm$ 1.77%                 | 24.90 $\pm$ 1.39%                 | 48.47 $\pm$ 1.77%                 | 30.73 $\pm$ 1.64%                 | 48.47 $\pm$ 1.77%                 | 39.76 $\pm$ 1.85%                 |
|               |                | Adversarial  | 27.23 $\pm$ 1.61%                 | 23.73 $\pm$ 1.47%                 | 33.97 $\pm$ 1.72%                 | 29.20 $\pm$ 1.67%                 | 42.73 $\pm$ 1.85%                 | 38.63 $\pm$ 1.78%                 |
| MAML-AD       | 32-32-32-32    | Clean        | 40.63 $\pm$ 1.69%                 | 23.03 $\pm$ 0.92%                 | 42.90 $\pm$ 1.88%                 | 33.13 $\pm$ 1.67%                 | 42.43 $\pm$ 1.80%                 | 38.47 $\pm$ 1.75%                 |
|               |                | Adversarial  | 27.87 $\pm$ 1.23%                 | 28.70 $\pm$ 1.65%                 | 33.50 $\pm$ 1.61%                 | 33.47 $\pm$ 1.67%                 | 40.87 $\pm$ 1.82%                 | 39.23 $\pm$ 1.82%                 |
| Matching Nets | 64-64-64-64    | Clean        | 43.87 $\pm$ 0.41%                 | 25.63 $\pm$ 0.36%                 | 43.87 $\pm$ 0.41%                 | 32.57 $\pm$ 0.50%                 | 43.87 $\pm$ 0.41%                 | 35.54 $\pm$ 0.44%                 |
|               |                | Adversarial  | 26.14 $\pm$ 0.41%                 | 28.96 $\pm$ 0.39%                 | 34.22 $\pm$ 0.48%                 | 33.92 $\pm$ 0.41%                 | 34.99 $\pm$ 0.38%                 | 36.23 $\pm$ 0.43%                 |
| Relation Nets | 64-96-128-256  | Clean        | 49.67 $\pm$ 0.85%                 | 25.53 $\pm$ 0.46%                 | 49.67 $\pm$ 0.85%                 | 32.64 $\pm$ 0.59%                 | 49.67 $\pm$ 0.85%                 | 42.06 $\pm$ 0.76%                 |
|               |                | Adversarial  | 26.94 $\pm$ 0.82%                 | 24.51 $\pm$ 0.47%                 | 34.07 $\pm$ 0.88%                 | 29.99 $\pm$ 0.61%                 | 42.76 $\pm$ 0.90%                 | 39.37 $\pm$ 0.75%                 |
| R2D2 (64C)    | 64-64-64-64    | Clean        | 49.52 $\pm$ 1.70%                 | 20.51 $\pm$ 0.32%                 | 49.52 $\pm$ 1.70%                 | 22.06 $\pm$ 0.85%                 | 49.52 $\pm$ 1.70%                 | 32.08 $\pm$ 1.60%                 |
|               |                | Adversarial  | 24.46 $\pm$ 1.37%                 | 24.29 $\pm$ 0.85%                 | 29.71 $\pm$ 1.53%                 | 27.15 $\pm$ 0.89%                 | 37.86 $\pm$ 1.76%                 | 34.63 $\pm$ 1.26%                 |
| R2D2          | 96-192-384-512 | Clean        | <b>51.80<math>\pm</math>1.70%</b> | 20.06 $\pm$ 0.26%                 | <b>51.80<math>\pm</math>1.70%</b> | 21.19 $\pm$ 0.54%                 | <b>51.80<math>\pm</math>1.70%</b> | 31.91 $\pm$ 1.42%                 |
|               |                | Adversarial  | 22.68 $\pm$ 1.35%                 | 24.14 $\pm$ 0.92%                 | 26.98 $\pm$ 1.48%                 | 26.94 $\pm$ 0.94%                 | 40.07 $\pm$ 1.79%                 | 34.26 $\pm$ 1.33%                 |
| ADML (Ours)   | 32-32-32-32    | Clean        | 42.20 $\pm$ 1.82%                 | <b>33.30<math>\pm</math>1.87%</b> | 48.60 $\pm$ 1.91%                 | <b>38.80<math>\pm</math>1.75%</b> | 48.80 $\pm$ 1.94%                 | <b>44.20<math>\pm</math>1.61%</b> |
|               |                | Adversarial  | <b>37.20<math>\pm</math>1.65%</b> | <b>31.00<math>\pm</math>1.71%</b> | <b>40.90<math>\pm</math>1.84%</b> | <b>35.70<math>\pm</math>1.78%</b> | <b>45.10<math>\pm</math>1.78%</b> | <b>39.70<math>\pm</math>1.91%</b> |

Table 6: Average classification accuracies on MiniImageNet with FFGSM Attack (5-way, 5-shot)

| Method        | Backbone       | Meta-testing | $\epsilon = 2$                    |                                   | $\epsilon = 1$                    |                                   | $\epsilon = 0.5$                  |                                   |
|---------------|----------------|--------------|-----------------------------------|-----------------------------------|-----------------------------------|-----------------------------------|-----------------------------------|-----------------------------------|
|               |                |              | Clean                             | Adversarial                       | Clean                             | Adversarial                       | Clean                             | Adversarial                       |
| MAML          | 32-32-32-32    | Clean        | 61.45 $\pm$ 0.91%                 | 30.46 $\pm$ 0.70%                 | 61.46 $\pm$ 0.91%                 | 40.91 $\pm$ 0.87%                 | 61.46 $\pm$ 0.91%                 | 53.58 $\pm$ 0.93%                 |
|               |                | 40%          | 54.29 $\pm$ 0.94%                 | 30.90 $\pm$ 0.74%                 | 57.77 $\pm$ 0.92%                 | 40.67 $\pm$ 0.87%                 | 59.85 $\pm$ 0.88%                 | 53.38 $\pm$ 0.96%                 |
|               |                | Adversarial  | 32.91 $\pm$ 0.85%                 | 31.90 $\pm$ 0.87%                 | 43.30 $\pm$ 0.89%                 | 41.18 $\pm$ 0.96%                 | 55.06 $\pm$ 0.93%                 | 51.63 $\pm$ 1.01%                 |
| MAML-AD       | 32-32-32-32    | Clean        | 57.55 $\pm$ 0.98%                 | 39.27 $\pm$ 0.93%                 | 58.74 $\pm$ 0.94%                 | 49.53 $\pm$ 0.95%                 | 59.63 $\pm$ 0.95%                 | 56.01 $\pm$ 0.98%                 |
|               |                | 40%          | 55.38 $\pm$ 0.93%                 | 40.98 $\pm$ 0.88%                 | 57.35 $\pm$ 0.91%                 | 49.89 $\pm$ 0.92%                 | 59.39 $\pm$ 0.94%                 | 55.83 $\pm$ 0.94%                 |
|               |                | Adversarial  | 41.19 $\pm$ 0.89%                 | 41.17 $\pm$ 0.96%                 | 51.51 $\pm$ 0.89%                 | 49.27 $\pm$ 0.94%                 | 56.97 $\pm$ 0.97%                 | 54.42 $\pm$ 0.99%                 |
| Matching Nets | 64-64-64-64    | Clean        | 55.99 $\pm$ 0.47%                 | 30.85 $\pm$ 0.45%                 | 55.99 $\pm$ 0.47%                 | 41.28 $\pm$ 0.42%                 | 55.99 $\pm$ 0.47%                 | 48.45 $\pm$ 0.44%                 |
|               |                | 40%          | 46.32 $\pm$ 0.41%                 | 32.77 $\pm$ 0.52%                 | 51.66 $\pm$ 0.45%                 | 45.53 $\pm$ 0.46%                 | 53.27 $\pm$ 0.40%                 | 49.61 $\pm$ 0.41%                 |
|               |                | Adversarial  | 32.65 $\pm$ 0.41%                 | 33.56 $\pm$ 0.50%                 | 45.30 $\pm$ 0.45%                 | 46.74 $\pm$ 0.52%                 | 48.98 $\pm$ 0.43%                 | 50.30 $\pm$ 0.45%                 |
| Relation Nets | 64-96-128-256  | Clean        | 63.85 $\pm$ 0.73%                 | 30.35 $\pm$ 0.50%                 | 63.85 $\pm$ 0.73%                 | 41.74 $\pm$ 0.62%                 | 63.85 $\pm$ 0.73%                 | 54.73 $\pm$ 0.68%                 |
|               |                | 40%          | 53.54 $\pm$ 0.83%                 | 28.89 $\pm$ 0.50%                 | 56.15 $\pm$ 0.78%                 | 38.75 $\pm$ 0.65%                 | 60.59 $\pm$ 0.74%                 | 52.59 $\pm$ 0.71%                 |
|               |                | Adversarial  | 37.34 $\pm$ 0.77%                 | 31.31 $\pm$ 0.53%                 | 49.51 $\pm$ 0.75%                 | 42.63 $\pm$ 0.66%                 | 58.90 $\pm$ 0.70%                 | 54.67 $\pm$ 0.71%                 |
| R2D2 (64C)    | 64-64-64-64    | Clean        | 65.48 $\pm$ 1.35%                 | 20.81 $\pm$ 0.45%                 | 65.48 $\pm$ 1.35%                 | 23.44 $\pm$ 0.95%                 | 65.48 $\pm$ 1.35%                 | 38.97 $\pm$ 1.62%                 |
|               |                | 40%          | 59.56 $\pm$ 1.58%                 | 28.71 $\pm$ 0.98%                 | 60.27 $\pm$ 1.59%                 | 36.07 $\pm$ 1.40%                 | 61.87 $\pm$ 1.58%                 | 48.33 $\pm$ 1.50%                 |
|               |                | Adversarial  | 30.83 $\pm$ 1.65%                 | 29.80 $\pm$ 0.99%                 | 40.40 $\pm$ 1.68%                 | 38.64 $\pm$ 1.37%                 | 51.03 $\pm$ 1.56%                 | 50.04 $\pm$ 1.46%                 |
| R2D2          | 96-192-384-512 | Clean        | <b>68.42<math>\pm</math>1.28%</b> | 20.61 $\pm$ 0.42%                 | <b>68.42<math>\pm</math>1.28%</b> | 22.97 $\pm$ 0.86%                 | <b>68.42<math>\pm</math>1.28%</b> | 39.53 $\pm$ 1.78%                 |
|               |                | 40%          | <b>60.68<math>\pm</math>1.48%</b> | 26.90 $\pm$ 1.05%                 | <b>61.14<math>\pm</math>1.60%</b> | 33.47 $\pm$ 1.14%                 | <b>63.77<math>\pm</math>1.64%</b> | 48.47 $\pm$ 1.51%                 |
|               |                | Adversarial  | 26.50 $\pm$ 1.37%                 | 29.11 $\pm$ 1.02%                 | 35.25 $\pm$ 1.49%                 | 38.00 $\pm$ 1.22%                 | 51.75 $\pm$ 1.56%                 | 50.94 $\pm$ 1.50%                 |
| ADML (Ours)   | 32-32-32-32    | Clean        | 58.68 $\pm$ 0.94%                 | <b>47.22<math>\pm</math>0.91%</b> | 60.22 $\pm$ 0.95%                 | <b>52.06<math>\pm</math>1.00%</b> | 62.07 $\pm$ 0.83%                 | <b>58.36<math>\pm</math>0.98%</b> |
|               |                | 40%          | 55.97 $\pm$ 0.84%                 | <b>43.69<math>\pm</math>0.93%</b> | 58.07 $\pm$ 0.87%                 | <b>51.68<math>\pm</math>0.89%</b> | 61.29 $\pm$ 0.88%                 | <b>57.61<math>\pm</math>0.92%</b> |
|               |                | Adversarial  | <b>50.98<math>\pm</math>0.94%</b> | <b>45.04<math>\pm</math>0.92%</b> | <b>56.56<math>\pm</math>0.91%</b> | <b>52.44<math>\pm</math>0.97%</b> | <b>60.20<math>\pm</math>0.95%</b> | <b>60.25<math>\pm</math>0.98%</b> |

## MINIIMAGENET WITH RFGSM ATTACK

Note that the maximum perturbations adopted in RFGSM Attack are 0.4, 0.2 and 0.1, the step size is set to 8/255 and the number of steps is 5.

Table 7: Average classification accuracies on MiniImageNet with RFGSM Attack (5-way, 1-shot)

| Method        | Backbone       | Meta-testing | $\epsilon = 0.4$                  |                                   | $\epsilon = 0.2$                  |                                   | $\epsilon = 0.1$                  |                                   |
|---------------|----------------|--------------|-----------------------------------|-----------------------------------|-----------------------------------|-----------------------------------|-----------------------------------|-----------------------------------|
|               |                |              | Clean                             | Adversarial                       | Clean                             | Adversarial                       | Clean                             | Adversarial                       |
| MAML          | 32-32-32-32    | Clean        | 48.47 $\pm$ 1.77%                 | 22.13 $\pm$ 1.27%                 | 48.47 $\pm$ 1.77%                 | 31.73 $\pm$ 1.70%                 | 48.47 $\pm$ 1.77%                 | 45.13 $\pm$ 1.82%                 |
|               |                | Adversarial  | 21.10 $\pm$ 1.51%                 | 22.17 $\pm$ 1.46%                 | 35.03 $\pm$ 1.74%                 | 30.00 $\pm$ 1.73%                 | 42.90 $\pm$ 1.73%                 | 41.23 $\pm$ 1.89%                 |
| MAML-AD       | 32-32-32-32    | Clean        | 41.53 $\pm$ 1.80%                 | 23.13 $\pm$ 1.09%                 | 42.53 $\pm$ 1.87%                 | 34.93 $\pm$ 1.55%                 | 43.07 $\pm$ 1.86%                 | 33.60 $\pm$ 1.48%                 |
|               |                | Adversarial  | 22.67 $\pm$ 1.08%                 | 32.07 $\pm$ 1.69%                 | 35.40 $\pm$ 1.62%                 | 37.27 $\pm$ 1.72%                 | 37.03 $\pm$ 1.65%                 | 38.63 $\pm$ 1.70%                 |
| Matching Nets | 64-64-64-64    | Clean        | 43.87 $\pm$ 0.41%                 | 23.63 $\pm$ 0.53%                 | 43.87 $\pm$ 0.41%                 | 31.53 $\pm$ 0.46%                 | 43.87 $\pm$ 0.41%                 | 36.32 $\pm$ 0.41%                 |
|               |                | Adversarial  | 25.55 $\pm$ 0.56%                 | 24.61 $\pm$ 0.49%                 | 33.37 $\pm$ 0.42%                 | 34.70 $\pm$ 0.39%                 | 36.59 $\pm$ 0.46%                 | 35.88 $\pm$ 0.51%                 |
| Relation Nets | 64-96-128-256  | Clean        | 49.67 $\pm$ 0.85%                 | 22.53 $\pm$ 0.39%                 | 49.67 $\pm$ 0.85%                 | 33.07 $\pm$ 0.59%                 | 49.67 $\pm$ 0.85%                 | 44.69 $\pm$ 0.78%                 |
|               |                | Adversarial  | 23.38 $\pm$ 0.75%                 | 22.45 $\pm$ 0.40%                 | 34.30 $\pm$ 0.88%                 | 31.04 $\pm$ 0.63%                 | 45.07 $\pm$ 0.88%                 | 42.12 $\pm$ 0.78%                 |
| R2D2 (64C)    | 64-64-64-64    | Clean        | 49.52 $\pm$ 1.70%                 | 20.34 $\pm$ 0.35%                 | 49.52 $\pm$ 1.70%                 | 22.78 $\pm$ 1.99%                 | 49.52 $\pm$ 1.70%                 | 38.24 $\pm$ 1.66%                 |
|               |                | Adversarial  | 22.08 $\pm$ 1.50%                 | 24.21 $\pm$ 0.78%                 | 30.29 $\pm$ 1.74%                 | 29.68 $\pm$ 1.23%                 | 42.11 $\pm$ 1.73%                 | 39.42 $\pm$ 1.34%                 |
| R2D2          | 96-192-384-512 | Clean        | <b>51.80<math>\pm</math>1.70%</b> | 20.12 $\pm$ 0.31%                 | <b>51.80<math>\pm</math>1.70%</b> | 22.27 $\pm$ 0.81%                 | <b>51.80<math>\pm</math>1.70%</b> | 39.23 $\pm$ 1.56%                 |
|               |                | Adversarial  | 20.94 $\pm$ 1.31%                 | 22.91 $\pm$ 0.72%                 | 28.82 $\pm$ 1.59%                 | 29.23 $\pm$ 1.04%                 | 44.37 $\pm$ 1.88%                 | 38.95 $\pm$ 1.36%                 |
| ADML (Ours)   | 32-32-32-32    | Clean        | 43.20 $\pm$ 1.74%                 | <b>33.10<math>\pm</math>1.80%</b> | 44.50 $\pm$ 1.88%                 | <b>42.70<math>\pm</math>1.68%</b> | 48.90 $\pm$ 1.64%                 | <b>45.31<math>\pm</math>1.68%</b> |
|               |                | Adversarial  | <b>33.10<math>\pm</math>1.57%</b> | <b>36.90<math>\pm</math>1.80%</b> | <b>41.90<math>\pm</math>1.79%</b> | <b>40.60<math>\pm</math>1.84%</b> | <b>45.70<math>\pm</math>1.68%</b> | <b>42.60<math>\pm</math>1.84%</b> |

Table 8: Average classification accuracies on MiniImageNet with RFGSM Attack (5-way, 5-shot)

| Method        | Backbone       | Meta-testing | $\epsilon = 0.4$                  |                                   | $\epsilon = 0.2$                  |                                   | $\epsilon = 0.1$                  |                                   |
|---------------|----------------|--------------|-----------------------------------|-----------------------------------|-----------------------------------|-----------------------------------|-----------------------------------|-----------------------------------|
|               |                |              | Clean                             | Adversarial                       | Clean                             | Adversarial                       | Clean                             | Adversarial                       |
| MAML          | 32-32-32-32    | Clean        | 61.45 $\pm$ 0.91%                 | 25.65 $\pm$ 0.62%                 | 61.46 $\pm$ 0.91%                 | 40.14 $\pm$ 0.88%                 | 61.45 $\pm$ 0.91%                 | 55.62 $\pm$ 0.97%                 |
|               |                | 40%          | 52.51 $\pm$ 0.93%                 | 24.80 $\pm$ 0.69%                 | 57.11 $\pm$ 0.91%                 | 42.15 $\pm$ 0.91%                 | 60.63 $\pm$ 0.91%                 | 56.29 $\pm$ 0.96%                 |
|               |                | Adversarial  | 26.92 $\pm$ 0.74%                 | 27.31 $\pm$ 0.71%                 | 44.26 $\pm$ 0.96%                 | 42.27 $\pm$ 0.91%                 | 58.11 $\pm$ 0.99%                 | 54.54 $\pm$ 0.98%                 |
| MAML-AD       | 32-32-32-32    | Clean        | 56.31 $\pm$ 0.99%                 | 27.11 $\pm$ 0.70%                 | 57.52 $\pm$ 0.99%                 | 47.70 $\pm$ 0.97%                 | 58.85 $\pm$ 0.95%                 | 54.21 $\pm$ 0.92%                 |
|               |                | 40%          | 50.73 $\pm$ 0.95%                 | 36.37 $\pm$ 0.84%                 | 57.06 $\pm$ 0.90%                 | 51.36 $\pm$ 0.98%                 | 58.89 $\pm$ 0.91%                 | 55.92 $\pm$ 0.93%                 |
|               |                | Adversarial  | 29.69 $\pm$ 0.77%                 | 46.85 $\pm$ 0.93%                 | 50.68 $\pm$ 0.92%                 | 52.72 $\pm$ 0.94%                 | 55.77 $\pm$ 0.97%                 | 54.85 $\pm$ 0.97%                 |
| Matching Nets | 64-64-64-64    | Clean        | 55.99 $\pm$ 0.47%                 | 24.11 $\pm$ 0.56%                 | 55.99 $\pm$ 0.47%                 | 38.53 $\pm$ 0.41%                 | 55.99 $\pm$ 0.47%                 | 52.13 $\pm$ 0.51%                 |
|               |                | 40%          | 47.53 $\pm$ 0.46%                 | 26.81 $\pm$ 0.50%                 | 52.26 $\pm$ 0.44%                 | 36.27 $\pm$ 0.50%                 | 54.83 $\pm$ 0.41%                 | 54.00 $\pm$ 0.46%                 |
|               |                | Adversarial  | 25.33 $\pm$ 0.52%                 | 28.45 $\pm$ 0.55%                 | 40.52 $\pm$ 0.39%                 | 36.61 $\pm$ 0.42%                 | 52.92 $\pm$ 0.46%                 | 53.33 $\pm$ 0.48%                 |
| Relation Nets | 64-96-128-256  | Clean        | 63.85 $\pm$ 0.73%                 | 24.75 $\pm$ 0.42%                 | 63.85 $\pm$ 0.73%                 | 40.59 $\pm$ 0.64%                 | 63.85 $\pm$ 0.73%                 | 56.94 $\pm$ 0.70%                 |
|               |                | 40%          | 52.29 $\pm$ 0.86%                 | 24.24 $\pm$ 0.44%                 | 56.17 $\pm$ 0.81%                 | 39.00 $\pm$ 0.63%                 | 61.36 $\pm$ 0.74%                 | 55.98 $\pm$ 0.73%                 |
|               |                | Adversarial  | 28.69 $\pm$ 0.74%                 | 27.60 $\pm$ 0.47%                 | 48.05 $\pm$ 0.88%                 | 43.20 $\pm$ 0.67%                 | 60.38 $\pm$ 0.77%                 | 56.11 $\pm$ 0.72%                 |
| R2D2 (64C)    | 64-64-64-64    | Clean        | 65.48 $\pm$ 1.35%                 | 20.38 $\pm$ 0.31%                 | 65.48 $\pm$ 1.35%                 | 24.89 $\pm$ 1.10%                 | 65.48 $\pm$ 1.35%                 | 48.47 $\pm$ 1.56%                 |
|               |                | 40%          | 59.35 $\pm$ 1.57%                 | 26.89 $\pm$ 0.89%                 | 60.35 $\pm$ 1.50%                 | 38.63 $\pm$ 1.40%                 | 61.83 $\pm$ 1.53%                 | 53.38 $\pm$ 1.51%                 |
|               |                | Adversarial  | 27.11 $\pm$ 1.36%                 | 28.80 $\pm$ 0.98%                 | 38.69 $\pm$ 1.69%                 | 42.28 $\pm$ 1.27%                 | 44.72 $\pm$ 1.75%                 | 54.53 $\pm$ 1.50%                 |
| R2D2          | 96-192-384-512 | Clean        | <b>68.42<math>\pm</math>1.28%</b> | 20.29 $\pm$ 0.26%                 | <b>68.42<math>\pm</math>1.28%</b> | 24.36 $\pm$ 0.92%                 | <b>68.42<math>\pm</math>1.28%</b> | 49.64 $\pm$ 1.68%                 |
|               |                | 40%          | <b>60.04<math>\pm</math>1.53%</b> | 24.20 $\pm$ 0.75%                 | <b>62.15<math>\pm</math>1.54%</b> | 35.73 $\pm$ 1.27%                 | <b>64.54<math>\pm</math>1.61%</b> | 54.33 $\pm$ 1.62%                 |
|               |                | Adversarial  | 22.57 $\pm$ 1.33%                 | 27.13 $\pm$ 0.86%                 | 36.22 $\pm$ 1.64%                 | 40.39 $\pm$ 1.14%                 | 56.92 $\pm$ 1.69%                 | 55.49 $\pm$ 1.51%                 |
| ADML (Ours)   | 32-32-32-32    | Clean        | 56.93 $\pm$ 0.89%                 | <b>43.62<math>\pm</math>0.93%</b> | 60.64 $\pm$ 1.03%                 | <b>53.54<math>\pm</math>0.93%</b> | 62.40 $\pm$ 0.91%                 | <b>58.33<math>\pm</math>0.95%</b> |
|               |                | 40%          | 55.09 $\pm$ 0.88%                 | <b>40.54<math>\pm</math>0.91%</b> | 58.43 $\pm$ 0.90%                 | <b>53.83<math>\pm</math>0.93%</b> | 62.37 $\pm$ 0.88%                 | <b>58.08<math>\pm</math>0.94%</b> |
|               |                | Adversarial  | <b>49.36<math>\pm</math>0.87%</b> | <b>47.78<math>\pm</math>0.83%</b> | <b>57.70<math>\pm</math>0.92%</b> | <b>56.77<math>\pm</math>0.89%</b> | <b>61.03<math>\pm</math>0.93%</b> | <b>58.44<math>\pm</math>0.92%</b> |

## MINIIMAGENET WITH RPGD ATTACK

Note that the maximum perturbations adopted in RPGD Attack are 1.6, 0.8 and 0.4, the step size is set to 2/255 and the number of steps is 40.

Table 9: Average classification accuracies on MiniImageNet with RPGD Attack (5-way, 1-shot)

| Method        | Backbone       | Meta-testing | $\epsilon = 1.6$                  |                                   | $\epsilon = 0.8$                  |                                   | $\epsilon = 0.4$                  |                                   |
|---------------|----------------|--------------|-----------------------------------|-----------------------------------|-----------------------------------|-----------------------------------|-----------------------------------|-----------------------------------|
|               |                |              | Clean                             | Adversarial                       | Clean                             | Adversarial                       | Clean                             | Adversarial                       |
| MAML          | 32-32-32-32    | Clean        | 48.47 $\pm$ 1.77%                 | 25.07 $\pm$ 1.44%                 | 48.47 $\pm$ 1.77%                 | 32.13 $\pm$ 1.67%                 | 48.47 $\pm$ 1.77%                 | 41.37 $\pm$ 1.78%                 |
|               |                | Adversarial  | 27.97 $\pm$ 1.59%                 | 24.77 $\pm$ 1.54%                 | 36.30 $\pm$ 1.77%                 | 30.57 $\pm$ 1.74%                 | 43.20 $\pm$ 1.82%                 | 39.57 $\pm$ 1.76%                 |
| MAML-AD       | 32-32-32-32    | Clean        | 41.03 $\pm$ 1.74%                 | 24.03 $\pm$ 0.87%                 | 42.27 $\pm$ 1.85%                 | 33.87 $\pm$ 1.59%                 | 42.63 $\pm$ 1.87%                 | 36.63 $\pm$ 1.67%                 |
|               |                | Adversarial  | 29.93 $\pm$ 1.49%                 | 29.83 $\pm$ 1.67%                 | 35.37 $\pm$ 1.64%                 | 35.97 $\pm$ 1.76%                 | 37.57 $\pm$ 1.65%                 | 38.07 $\pm$ 1.77%                 |
| Matching Nets | 64-64-64-64    | Clean        | 43.87 $\pm$ 0.41%                 | 26.36 $\pm$ 0.43%                 | 43.87 $\pm$ 0.41%                 | 31.08 $\pm$ 0.40%                 | 43.87 $\pm$ 0.41%                 | 35.26 $\pm$ 0.56%                 |
|               |                | Adversarial  | 29.36 $\pm$ 0.36%                 | 28.34 $\pm$ 0.39%                 | 33.52 $\pm$ 0.58%                 | 30.02 $\pm$ 0.52%                 | 36.60 $\pm$ 0.51%                 | 33.75 $\pm$ 0.48%                 |
| Relation Nets | 64-96-128-256  | Clean        | 49.67 $\pm$ 0.85%                 | 26.77 $\pm$ 0.47%                 | 49.67 $\pm$ 0.85%                 | 34.99 $\pm$ 0.64%                 | 49.67 $\pm$ 0.85%                 | 43.67 $\pm$ 0.78%                 |
|               |                | Adversarial  | 28.19 $\pm$ 0.80%                 | 25.32 $\pm$ 0.48%                 | 36.34 $\pm$ 0.88%                 | 32.19 $\pm$ 0.63%                 | 44.18 $\pm$ 0.87%                 | 41.01 $\pm$ 0.77%                 |
| R2D2 (64C)    | 64-64-64-64    | Clean        | 49.52 $\pm$ 1.70%                 | 20.58 $\pm$ 0.39%                 | 49.52 $\pm$ 1.70%                 | 23.46 $\pm$ 0.96%                 | 49.52 $\pm$ 1.70%                 | 34.92 $\pm$ 1.62%                 |
|               |                | Adversarial  | 24.90 $\pm$ 1.43%                 | 25.30 $\pm$ 0.96%                 | 31.70 $\pm$ 1.67%                 | 28.27 $\pm$ 1.21%                 | 40.52 $\pm$ 1.74%                 | 37.49 $\pm$ 1.28%                 |
| R2D2          | 96-192-384-512 | Clean        | <b>51.80<math>\pm</math>1.70%</b> | 20.19 $\pm$ 0.32%                 | <b>51.80<math>\pm</math>1.70%</b> | 22.80 $\pm$ 0.82%                 | <b>51.80<math>\pm</math>1.70%</b> | 34.93 $\pm$ 1.56%                 |
|               |                | Adversarial  | 22.04 $\pm$ 1.26%                 | 25.30 $\pm$ 0.97%                 | 30.63 $\pm$ 1.63%                 | 28.00 $\pm$ 1.04%                 | 42.80 $\pm$ 1.85%                 | 37.18 $\pm$ 1.44%                 |
| ADML (Ours)   | 32-32-32-32    | Clean        | 45.20 $\pm$ 1.85%                 | <b>40.00<math>\pm</math>1.86%</b> | 43.90 $\pm$ 1.82%                 | <b>40.50<math>\pm</math>1.72%</b> | 48.90 $\pm$ 1.82%                 | <b>44.52<math>\pm</math>1.96%</b> |
|               |                | Adversarial  | <b>37.90<math>\pm</math>1.77%</b> | <b>34.90<math>\pm</math>1.74%</b> | <b>42.60<math>\pm</math>1.64%</b> | <b>39.30<math>\pm</math>1.83%</b> | <b>45.40<math>\pm</math>1.92%</b> | <b>41.50<math>\pm</math>1.83%</b> |

Table 10: Average classification accuracies on MiniImageNet with RPGD Attack (5-way, 5-shot)

| Method        | Backbone       | Meta-testing | $\epsilon = 1.6$                  |                                   | $\epsilon = 0.8$                  |                                   | $\epsilon = 0.4$                  |                                   |
|---------------|----------------|--------------|-----------------------------------|-----------------------------------|-----------------------------------|-----------------------------------|-----------------------------------|-----------------------------------|
|               |                |              | Clean                             | Adversarial                       | Clean                             | Adversarial                       | Clean                             | Adversarial                       |
| MAML          | 32-32-32-32    | Clean        | 61.45 $\pm$ 0.91%                 | 32.24 $\pm$ 0.78%                 | 61.45 $\pm$ 0.91%                 | 43.41 $\pm$ 0.92%                 | 61.45 $\pm$ 0.91%                 | 54.96 $\pm$ 0.89%                 |
|               |                | 40%          | 55.39 $\pm$ 0.90%                 | 31.55 $\pm$ 0.78%                 | 57.41 $\pm$ 0.95%                 | 43.97 $\pm$ 1.00%                 | 59.99 $\pm$ 0.90%                 | 54.89 $\pm$ 0.94%                 |
|               |                | Adversarial  | 34.48 $\pm$ 0.83%                 | 33.69 $\pm$ 0.83%                 | 46.48 $\pm$ 0.87%                 | 44.67 $\pm$ 0.92%                 | 57.59 $\pm$ 0.91%                 | 54.05 $\pm$ 0.93%                 |
| MAML-AD       | 32-32-32-32    | Clean        | 56.31 $\pm$ 0.98%                 | 42.80 $\pm$ 0.88%                 | 58.56 $\pm$ 0.93%                 | 51.43 $\pm$ 0.97%                 | 60.06 $\pm$ 0.95%                 | 56.18 $\pm$ 0.93%                 |
|               |                | 40%          | 53.99 $\pm$ 0.94%                 | 43.58 $\pm$ 0.88%                 | 57.23 $\pm$ 0.97%                 | 51.61 $\pm$ 1.00%                 | 58.35 $\pm$ 0.96%                 | 56.05 $\pm$ 0.94%                 |
|               |                | Adversarial  | 46.41 $\pm$ 0.90%                 | 43.90 $\pm$ 0.90%                 | 53.87 $\pm$ 0.93%                 | 52.68 $\pm$ 0.92%                 | 57.33 $\pm$ 0.91%                 | 55.93 $\pm$ 0.92%                 |
| Matching Nets | 64-64-64-64    | Clean        | 55.99 $\pm$ 0.47%                 | 33.50 $\pm$ 0.42%                 | 55.99 $\pm$ 0.47%                 | 44.11 $\pm$ 0.36%                 | 55.99 $\pm$ 0.47%                 | 53.31 $\pm$ 0.45%                 |
|               |                | 40%          | 49.33 $\pm$ 0.45%                 | 34.58 $\pm$ 0.40%                 | 51.56 $\pm$ 0.42%                 | 44.89 $\pm$ 0.39%                 | 54.02 $\pm$ 0.47%                 | 53.78 $\pm$ 0.53%                 |
|               |                | Adversarial  | 35.02 $\pm$ 0.40%                 | 34.67 $\pm$ 0.39%                 | 43.08 $\pm$ 0.40%                 | 45.84 $\pm$ 0.42%                 | 52.15 $\pm$ 0.49%                 | 51.36 $\pm$ 0.44%                 |
| Relation Nets | 64-96-128-256  | Clean        | 63.85 $\pm$ 0.73%                 | 32.15 $\pm$ 0.54%                 | 63.85 $\pm$ 0.73%                 | 44.52 $\pm$ 0.64%                 | 63.85 $\pm$ 0.73%                 | 56.53 $\pm$ 0.68%                 |
|               |                | 40%          | 54.06 $\pm$ 0.82%                 | 30.69 $\pm$ 0.54%                 | 57.20 $\pm$ 0.80%                 | 41.96 $\pm$ 0.70%                 | 58.53 $\pm$ 0.74%                 | 54.91 $\pm$ 0.75%                 |
|               |                | Adversarial  | 39.64 $\pm$ 0.79%                 | 34.20 $\pm$ 0.57%                 | 51.91 $\pm$ 0.74%                 | 46.04 $\pm$ 0.66%                 | 59.12 $\pm$ 0.70%                 | 56.13 $\pm$ 0.70%                 |
| R2D2 (64C)    | 64-64-64-64    | Clean        | 65.48 $\pm$ 1.35%                 | 21.06 $\pm$ 0.55%                 | 65.48 $\pm$ 1.35%                 | 26.08 $\pm$ 1.14%                 | 65.48 $\pm$ 1.35%                 | 43.64 $\pm$ 1.54%                 |
|               |                | 40%          | 59.79 $\pm$ 1.53%                 | 30.65 $\pm$ 1.07%                 | 60.54 $\pm$ 1.59%                 | 39.01 $\pm$ 1.48%                 | 62.36 $\pm$ 1.61%                 | 37.49 $\pm$ 1.28%                 |
|               |                | Adversarial  | 33.70 $\pm$ 1.60%                 | 32.25 $\pm$ 1.25%                 | 42.28 $\pm$ 1.64%                 | 42.32 $\pm$ 1.40%                 | 54.35 $\pm$ 1.70%                 | 53.65 $\pm$ 1.35%                 |
| R2D2          | 96-192-384-512 | Clean        | <b>68.42<math>\pm</math>1.28%</b> | 20.85 $\pm$ 0.53%                 | <b>68.42<math>\pm</math>1.28%</b> | 25.35 $\pm$ 1.13%                 | <b>68.42<math>\pm</math>1.28%</b> | 44.63 $\pm$ 1.70%                 |
|               |                | 40%          | <b>60.66<math>\pm</math>1.56%</b> | 28.77 $\pm$ 1.01%                 | <b>61.48<math>\pm</math>1.60%</b> | 36.32 $\pm$ 1.31%                 | <b>63.15<math>\pm</math>1.59%</b> | 52.01 $\pm$ 1.52%                 |
|               |                | Adversarial  | 27.59 $\pm$ 1.39%                 | 31.16 $\pm$ 1.11%                 | 40.29 $\pm$ 1.51%                 | 41.16 $\pm$ 1.34%                 | 55.50 $\pm$ 1.63%                 | 54.00 $\pm$ 1.50%                 |
| ADML (Ours)   | 32-32-32-32    | Clean        | 58.40 $\pm$ 0.94%                 | <b>48.62<math>\pm</math>0.97%</b> | 59.94 $\pm$ 0.86%                 | <b>54.62<math>\pm</math>1.01%</b> | 61.54 $\pm$ 0.97%                 | <b>57.20<math>\pm</math>0.94%</b> |
|               |                | 40%          | 56.28 $\pm$ 0.94%                 | <b>45.83<math>\pm</math>0.90%</b> | 58.27 $\pm$ 0.92%                 | <b>53.60<math>\pm</math>0.99%</b> | 60.68 $\pm$ 0.93%                 | <b>56.33<math>\pm</math>0.98%</b> |
|               |                | Adversarial  | <b>52.28<math>\pm</math>0.88%</b> | <b>45.82<math>\pm</math>0.94%</b> | <b>57.36<math>\pm</math>0.96%</b> | <b>54.39<math>\pm</math>0.96%</b> | <b>59.68<math>\pm</math>0.92%</b> | <b>57.16<math>\pm</math>1.00%</b> |
